# Supplementary material for: Efficient differentiation of human embryonic stem cells to definitive endoderm
Source: Springer Nature journal article supplement (doi:10.1038/nbt1163), 2005-10-28

**Supplementary Fig. 2 Exogenous activin exposure determines the proportion of mesoderm and DE.**

**a**

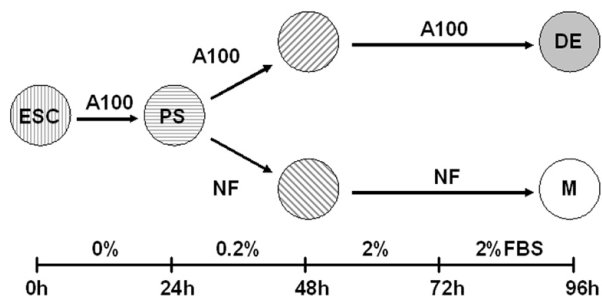

(a) Diagram showing the differentiation procedure for the experiment. Two plates of hESCs are supplied with 100 ng/mL activin in 0% FBS for 24 hours after which it is either removed (NF) or maintained (A100) for the subsequent 3 days of differentiation.

(b) Higher levels of gene expression characteristic of DE (GSC, SOX17, FOXA2) are observed in the condition that maintains high activin A exposure.

(c) Gene expression characteristic of mesoderm cell types (brachyury, FOXF1, FLK1, BMP4, MOX1, SDF1) is primarily observed only when exogenous activin A is removed after the initial 24 hours of exposure.

**b**

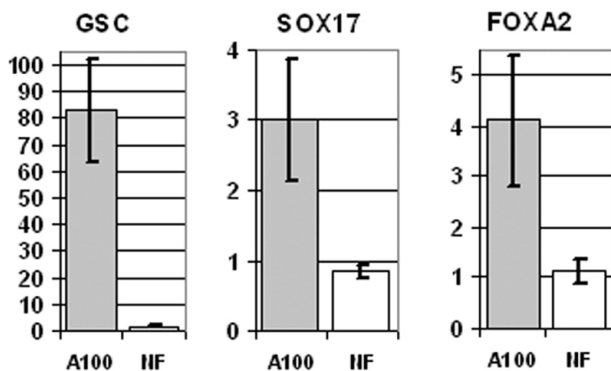

**c**

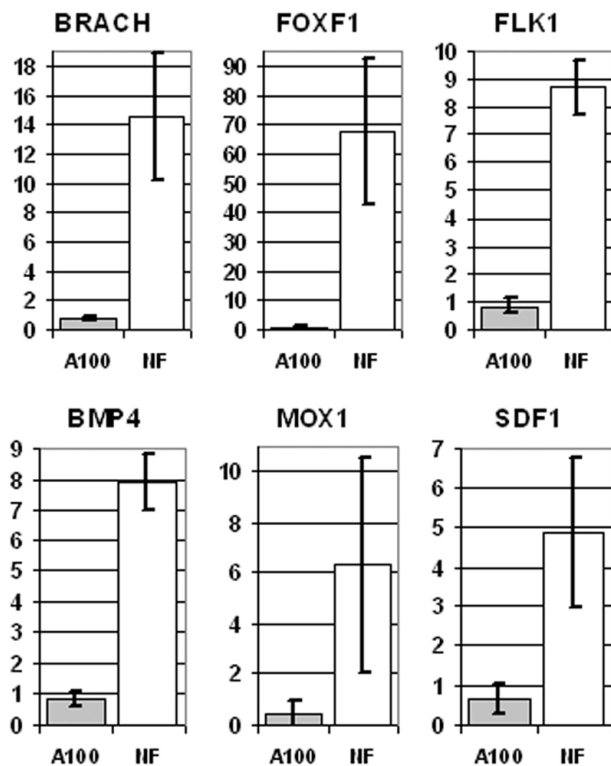

Supplement: 41587_2005_BFnbt1163_MOESM2_ESM.pdf [file 41587_2005_BFnbt1163_MOESM2_ESM.pdf]
