# Supplementary material for: Efficient differentiation of human embryonic stem cells to definitive endoderm
Source: Springer Nature journal article supplement (doi:10.1038/nbt1163), 2005-10-28
Supplement: 41587_2005_BFnbt1163_MOESM4_ESM.pdf [file 41587_2005_BFnbt1163_MOESM4_ESM.pdf]

Supplementary Fig. 4

Immunocytochemical analyses of E-cadherin, N-cadherin, and brachyury during hESC-DE differentiation

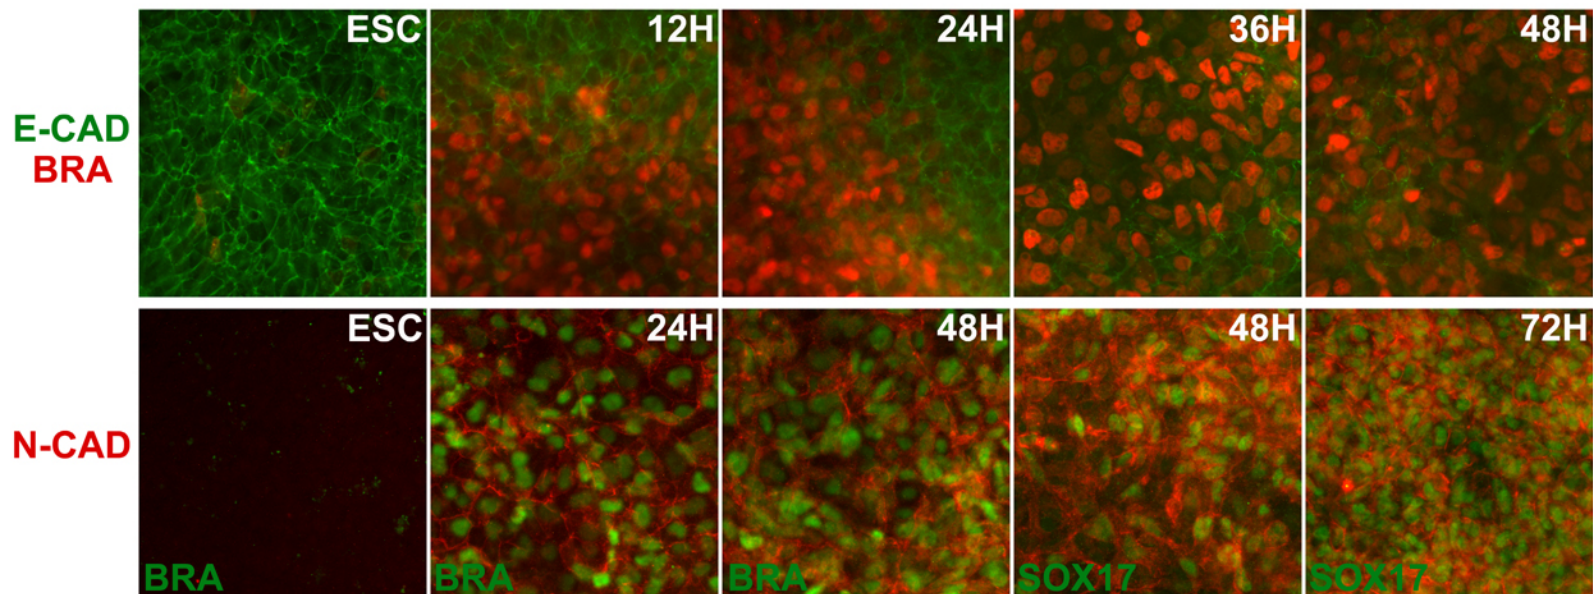

Higher magnification photos of images depicted in Figure 4 to demonstrate cell surface localization of E-cadherin and N-cadherin. E-CAD=E-cadherin, N-CAD=N-cadherin, BRA=brachyury.
