# Supplementary material for: Efficient differentiation of human embryonic stem cells to definitive endoderm
Source: Springer Nature journal article supplement (doi:10.1038/nbt1163), 2005-10-28
Supplement: 41587_2005_BFnbt1163_MOESM5_ESM.pdf [file 41587_2005_BFnbt1163_MOESM5_ESM.pdf]

Supplementary Fig. 5 Quantification of CXCR4-positive cell numbers by flow cytometry.

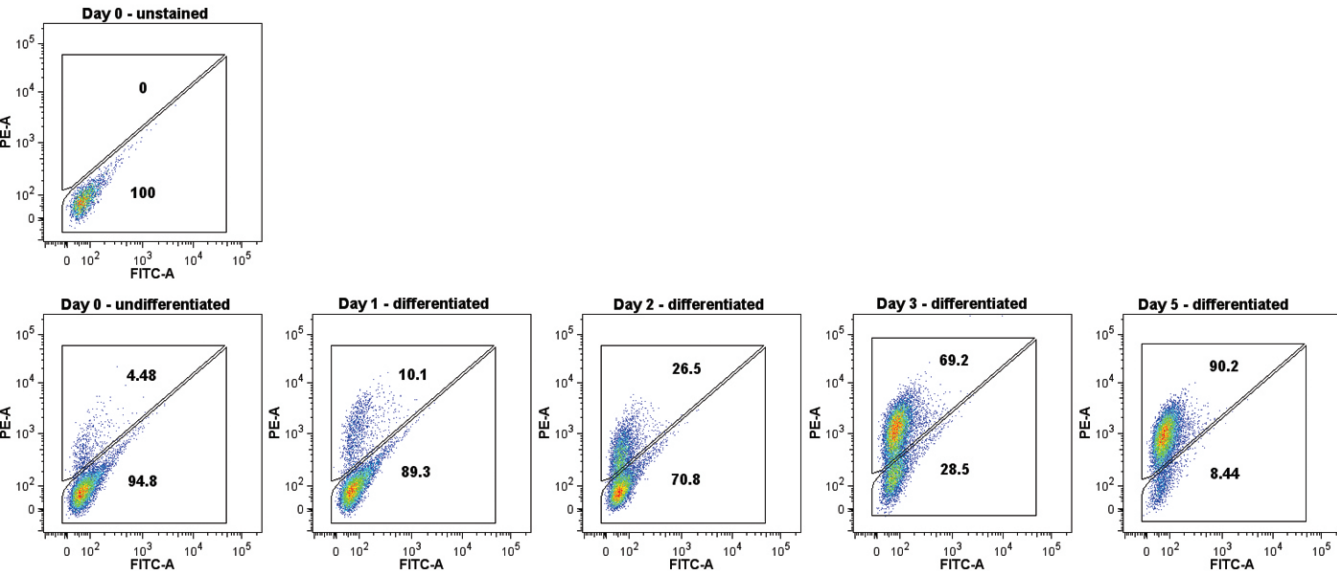

Flow cytometry profiles of CXCR4-positive cells in undifferentiated hESCs at time zero and at days 1, 2, 3, and 5 of differentiation in activin exposed cultures. Results are also depicted graphically in Figure 5b.
