# Supplementary material for: Efficient differentiation of human embryonic stem cells to definitive endoderm
Source: Springer Nature journal article supplement (doi:10.1038/nbt1163), 2005-10-28
Supplement: 41587_2005_BFnbt1163_MOESM6_ESM.pdf [file 41587_2005_BFnbt1163_MOESM6_ESM.pdf]

# Supplementary Fig. 6 CXCR4-based isolation of hESC-DE can be applied to multiple hESC lines

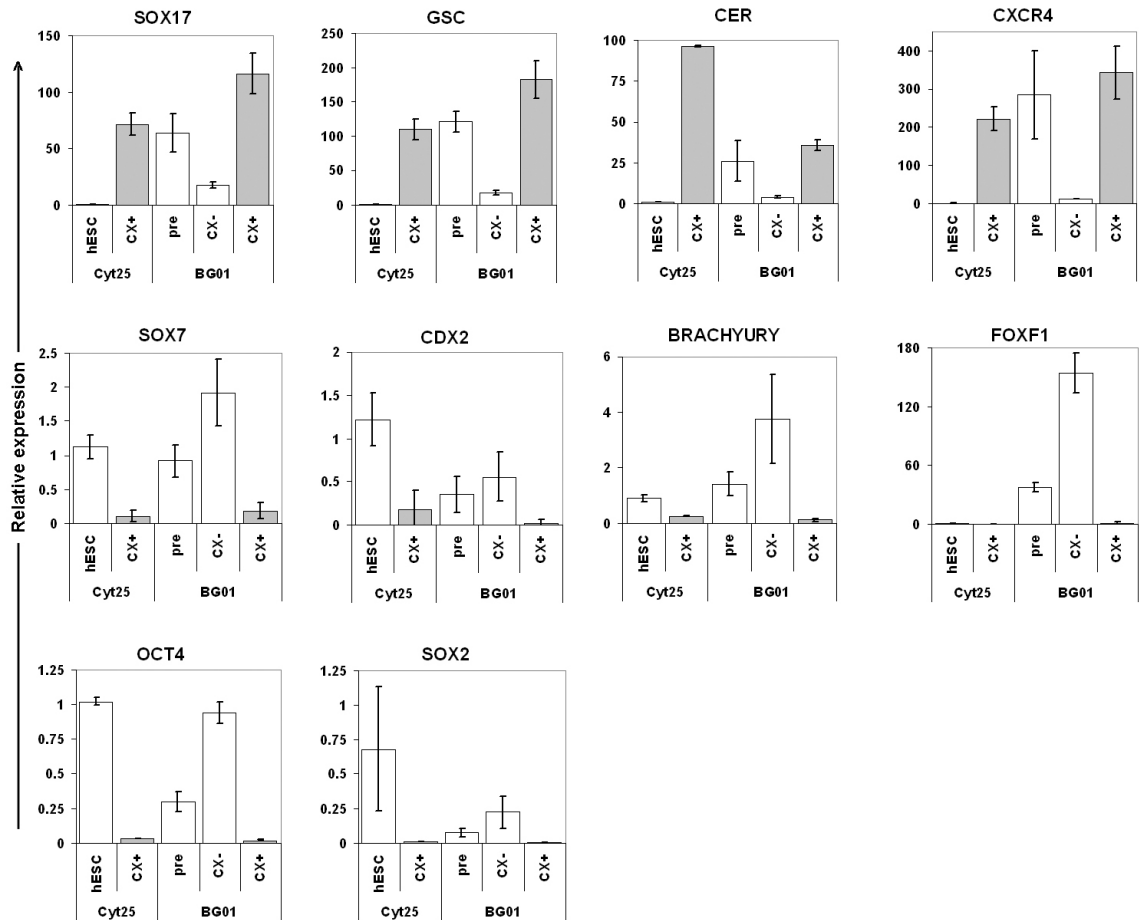

CXCR4 immunoreactive cells were isolated after 5 days differentiation of BG01 hESCs in high dose activin A/low FBS. Enrichment of the DE expressed genes SOX17, GSC, CER and CXCR4 is evident in the CXCR4-positive fraction relative to the pre-sort parent population. The CXCR4-negative fraction is highly depleted in DE gene expression. The converse is true for genes expressed in PrE (SOX7), TE (CDX2), primitive streak (brachyury), mesoderm (brachyury, FOXF1), neurectoderm (SOX2), and hESCs (OCT4, SOX2). These genes are all enriched in the CXCR4-negative fraction and depleted in the CXCR4-positive fraction relative to the pre-sort parent population. Comparison of the gene expression levels in CXCR4-positive hESC-DE isolated from either Cyt25 or BG01 shows that expression levels of both DE-expressed and non-DE expressed genes are very similar.
