# Supplementary material for: Efficient differentiation of human embryonic stem cells to definitive endoderm
Source: Springer Nature journal article supplement (doi:10.1038/nbt1163), 2005-10-28
Supplement: 41587_2005_BFnbt1163_MOESM9_ESM.pdf [file 41587_2005_BFnbt1163_MOESM9_ESM.pdf]

**Supplementary Table 1 Gene expression of markers during gastrulation**

| Gene Name                                   | Gene Abb. | Expression domains – gastrulation stage |    |      |      |     |              |    | Refs       | Primers (Forward/Reverse; 5'-to-3')                |
|---------------------------------------------|-----------|-----------------------------------------|----|------|------|-----|--------------|----|------------|----------------------------------------------------|
|                                             |           | ICM ESC                                 | PS | Ecto | Meso | DE  | PrE/ VE / PE | TE |            |                                                    |
| nodal                                       | NODAL     | -/+                                     | +  | -    | +    | -   | +            | -  | 7, 62, 63  | CCGAGGGCAGACATCATCC<br>CCATCCACTGCCACATCTTCT       |
| fibroblast growth factor 8                  | FGF8      | -                                       | +  | +    | +    | -   | +            | -  | 32, 64     | CGACCCCTTCGCAAAGCT<br>GGACTCGAACTCTGCTTCCAAA       |
| wingless 3                                  | WNT3      | -                                       | +  | -    | +    | -   | +            | -  | 5          | ABI Taqman assay# Hs00229135_m1                    |
| brachyury                                   | BRACH     | -                                       | +  | -    | +    | -   | -            | -  | 22         | TGCTTCCTGAGACCCAGTT<br>GATCACTTCTTTCCTTTGCATCAAG   |
| fibroblast growth factor 4                  | FGF4      | +                                       | +  | -    | -    | -   | -            | -  | 35, 36     | GACACCCGCGACAGCCT<br>TCACCACGCCCGCT                |
| snail homolog 1                             | SNAI1     | -                                       | +  | -    | +    | +   | +            | +  | 65         | ABI Taqman assay# Hs00195591_m1                    |
| Mix1 homeobox-like 1                        | MIXL1     | -                                       | +  | -    | +    | -   | +            | -  | 20, 21     | CCGAGTCCAGGATCCAGGTA<br>CTCTGACGCGGAGACTTGG        |
| LIM homeobox 1                              | LHX1      | -                                       | +  | -    | +    | -   | +            | -  | 33, 34, 35 | TCCCAATGGTCCCTTCTC<br>CGTAGTACTCGCTCTGGTAATCTCC    |
| gooseoid                                    | GSC       | -                                       | +  | -    | +    | +   | +            | -  | 19         | GAGGAGAAAGTGGAGGTCTGGTT<br>CTCTGATGAGGACCGCTTCTG   |
| cerberus 1                                  | CER       | -                                       | -  | -    | +    | +   | +            | -  | 37-40      | ACAGTCCCTTCAGCCAGACT<br>ACAACACTTTTTTACAGCCTTCGT   |
| SRY (sex determining region Y)-box 17       | SOX17     | -                                       | -  | -    | -    | +   | +            | -  | 18         | GGCGCAGCAGAATCCAGA<br>CCACGACTTGCCAGCAT            |
| chemokine (C-X-C motif) receptor 4          | CXCR4     | -                                       | -  | -    | +    | +   | -            | -  | 16         | CACCGCATCTGGAGAACCA<br>GCCCATTTCTCGGTGTAGTT        |
| hepatocyte nuclear factor 3, beta           | FOXA2     | -                                       | +  | -    | +    | +   | +            | -  | 13-15      | GGGAGCGGTGAAGATGGA<br>TCATGTTGCTCACGGAGGAGTA       |
| SRY (sex determining region Y)-box 7        | SOX7      | -                                       | -  | -    | -    | -   | +            | -  | 18         | ACGCCGAGCTCAGCAAGAT<br>TCCAGTACGGCCTCTTCTG         |
| caudal homeobox domain 1                    | CDX1      | -                                       | -  | +    | +    | -   | +            | -  | 46, 47     | TCAGAGCTGGCTGCCAATC<br>TGGAACCAGATCTTCACCTGC       |
| E-cadherin (epithelial)                     | ECAD      | +                                       | -  | +    | -    | +/- | +            | +  | 66         | AGGAATCTTGTCTTGTAAATCTG<br>CGAAGAAACAGCAAGAGCAGC   |
| N-cadherin (neuronal)                       | NCAD      | -                                       | +  | -    | +    | +   | -            | -  | 3, 51, 52  | CCCACACCTGGAGACATTTG<br>GCCGCTTTAAGGCCCTCA         |
| SRY (sex determining region Y)-box 1        | SOX1      | -                                       | -  | +    | -    | -   | -            | -  | 25         | ATGCACCGCTACGACATGG<br>CTCATGTAGCCCTGCGAGTTG       |
| zinc finger protein of the cerebellum 1     | ZIC1      | -                                       | -  | +    | +    | -   | -            | -  | 26, 27     | CTGGCTGTGGCAAGGTCTTC<br>CAGCCCTCAAACCTCGCACT       |
| POU domain, class 5, transcription factor 1 | OCT4      | +                                       | -  | -    | -    | -   | +            | -  | 67, 68     | TGGGCTCGAGAAGGATGTG<br>GCATAGTCGTGCTTGATCG         |
| SRY (sex determining region Y)-box 2        | SOX2      | +                                       | -  | +    | -    | -   | -            | -  | 69         | ABI Taqman assay # Hs00602736_s1                   |
| forkhead box F1                             | FOXF1     | -                                       | -  | -    | +    | -   | -            | -  | 41, 42     | GCCGAGCTGCAAGGCA<br>AACTCCTTTCGGTCACACATGC         |
| mesenchyme homeo box 1                      | MEOX1     | -                                       | -  | -    | +    | -   | -            | -  | 23, 24     | AGGCGGAGAAAGGAGAGTTTCAG<br>CTCCGGCTTCCCTCTGTTC     |
| VEGFR, kinase insert domain receptor        | FLK1      | -                                       | -  | -    | +    | -   | -            | -  | 43         | ACTTTGGAAGACAGAACCAAATTATCTC<br>TGGCACCATTTCCACCA  |
| bone morphogenetic protein 4                | BMP4      | -                                       | -  | -    | +    | -   | -            | +  | 44         | GTGAGGAGCTTCCACCACGA<br>ACTGGTCCCTGGGATGTCTC       |
| stromal cell-derived factor 1               | SDF1      | unk                                     | -  | -    | +    | -   | +            | +  | 16         | TGACCCGAAGCTAAAGTGGATT<br>CCTCTCACATCTTGAACTCTTGTT |
| caudal homeobox domain 2                    | CDX2      | -                                       | -  | -    | -    | -   | -            | +  | 48         | GGGCTCTCTGAGAGGCAGGT<br>CCTTTGCTCTGCGGTCTCTG       |
| chorionic gonadotropin, beta polypeptide 5  | HCG       | -                                       | -  | -    | -    | -   | -            | +  | 49         | AAGGATGGAGATGTTCCAGGG<br>CCATGTCCCGCCCATG          |
| cyclophilin G                               | CYCG      | N/A – housekeeping gene                 |    |      |      |     |              |    |            | CTTGTC AATGGCCAACAGAGG<br>GCCCATCTAAATGAGGAGTTGGT  |
| glucuronidase beta                          | GUSB      | N/A – housekeeping gene                 |    |      |      |     |              |    |            | ACGCAGAAAATATGTGGTTGGA<br>GCACTCTCGTGGTACTGTT      |
| TATA binding protein                        | TBP       | N/A – housekeeping gene                 |    |      |      |     |              |    |            | TGTGCACAGGACCAAGAGT<br>ATTTTCTTGCTGCCAGTCTGG       |

Supplementary Table 1 - Additional references.

62. Zhou, X., Sasaki, H., Lowe, L., Hogan, B.L. & Kuehn, M.R. Nodal is a novel TGF-beta-like gene expressed in the mouse node during gastrulation. *Nature* **361**, 543-547 (1993).
63. Varlet, I., Collignon, J. & Robertson, E.J. nodal expression in the primitive endoderm is required for specification of the anterior axis during mouse gastrulation. *Development* **124**, 1033-1044 (1997).
64. Maruoka, Y. et al. Comparison of the expression of three highly related genes, Fgf8, Fgf17 and Fgf18, in the mouse embryo. *Mech Dev* **74**, 175-177 (1998).
65. Nieto, M.A., Bennett, M.F., Sargent, M.G. & Wilkinson, D.G. Cloning and developmental expression of Sna, a murine homologue of the Drosophila snail gene. *Development* **116**, 227-237 (1992).
66. Stemmler, M.P., Hecht, A., Kinzel, B. & Kemler, R. Analysis of regulatory elements of E-cadherin with reporter gene constructs in transgenic mouse embryos. *Dev Dyn* **227**, 238-245 (2003).
67. Rosner, M.H. et al. A POU-domain transcription factor in early stem cells and germ cells of the mammalian embryo. *Nature* **345**, 686-692 (1990).
68. Pesce, M. & Scholer, H.R. Oct-4: gatekeeper in the beginnings of mammalian development. *Stem Cells* **19**, 271-278 (2001).
69. Ellis, P. et al. SOX2, a persistent marker for multipotential neural stem cells derived from embryonic stem cells, the embryo or the adult. *Dev Neurosci* **26**, 148-165 (2004).
